# Supplementary material for: IGFBP3 deposited in the human umbilical cord mesenchymal stem cell‐secreted extracellular matrix promotes bone formation
Source: PubMed Central journal article supplement (PMC6220941; doi:10.1002/jcp.26342), 2018-03-01
Supplement: JCP-233-5792-s001.pdf [file JCP-233-5792-s001.pdf]

## Supplementary materials for review

IGFBP3 deposited in the human umbilical cord mesenchymal stem cell-secreted  
extracellular matrix promotes bone formation

Moyuan Deng <sup>a\*</sup>, Keyu Luo <sup>a</sup>, Tianyong Hou <sup>a</sup>, Fei Luo<sup>a</sup>, Zhao Xie <sup>a</sup>, Zehua Zhang<sup>a</sup>,  
Aijun Yang <sup>a</sup>, Bo Yu<sup>a</sup>, Shaoxuan Yi <sup>a</sup>, Shiwu Dong <sup>a, b\*</sup>, Jianzhong Xu <sup>a\*</sup>

a National and Regional United Engineering Lab of Tissue Engineering, Department  
of Orthopaedics, Southwest Hospital, the Third Military Medical University,  
Chongqing, China

b Department of Biomedical Materials Science, College of Biomedical Engineering,  
Third Military Medical University, Chongqing, China

\* Correspondence: Moyuan Deng (T: +86-023-68765286; F: +86-023-68765286,  
E-mail: [betty.deng@126.com](mailto:betty.deng@126.com)); Shiwu Dong (T: +86-023-68771270, F:  
+86-023-68771270, E-mail: [dongshiwu@163.com](mailto:dongshiwu@163.com)); Jianzhong Xu (T:  
+86-023-68754164, F: +86-023-68773003, E-mail: [jianzhong\\_xu@126.com](mailto:jianzhong_xu@126.com))

Supplemental Table 1 Gene primers for Real time PCR

| Gene    | GenBank ID     | Sequence |                          |
|---------|----------------|----------|--------------------------|
| TβR I   | NM_001130916.2 | Forward  | GAGCCGCTGCCCATCGTGTAC    |
|         |                | Reverse  | GGCGCCAATGACACAGAGATC    |
| CCR2    | NM_001123041.2 | Forward  | TCGGCCTGAGTAACTGTGAAAGC  |
|         |                | Reverse  | CTCCCAACGAAGGCATAGATG    |
| CXCR4   | NM_001008540.2 | Forward  | TGCCCTCCTGCTGACTATTCC    |
|         |                | Reverse  | AGGATAAGGCCAACCATGATG    |
| PDGF-Rα | NM_001347827.1 | Forward  | TGAAGGCAGGCACATTTACATCTA |
|         |                | Reverse  | TACAGGAGTCTCGGGATCAGTTG  |
| PDGF-Rβ | NM_002609.3    | Forward  | GGGGACAGGGAGGTGGATT      |
|         |                | Reverse  | ATTCCCGATCACAATGCACA     |
| CCR4    | NM_005508.4    | Forward  | CAGCTCCCTGGAAATCAACATTC  |
|         |                | Reverse  | CAGTCTTGGCAGAGCACAAAAGG  |
| IGF1R   | NM_000875.4    | Forward  | ACCCGGAGTACTTCAGCGC      |
|         |                | Reverse  | CACAGAAGCTTCGTTGAGAA     |
| GAPDH   | NM_001289746.1 | Forward  | CTTCAACAGCGACACCCACT     |
|         |                | Reverse  | GTGGTCCAGGGGTCTTACTC     |
| CCR2    | NM_009915.2    | Forward  | GGAGAA AAGCCA ACT CCT TC |
|         |                | Reverse  | AGG CAG TTGCAA AGG TACTG |

|       |                |         |                        |
|-------|----------------|---------|------------------------|
| TβR I | NM_001312868.1 | Forward | TGTGTCGAAAGCATGAAGGA   |
|       |                | Reverse | GGTCCCAGCACTCAGTCAAC   |
| GAPDH | NM_001289726.1 | Forward | TCAAGAAGGTGGGTGAAGCAGG |
|       |                | Reverse | TATTATGGGGGTCTGGGATGG  |



**A**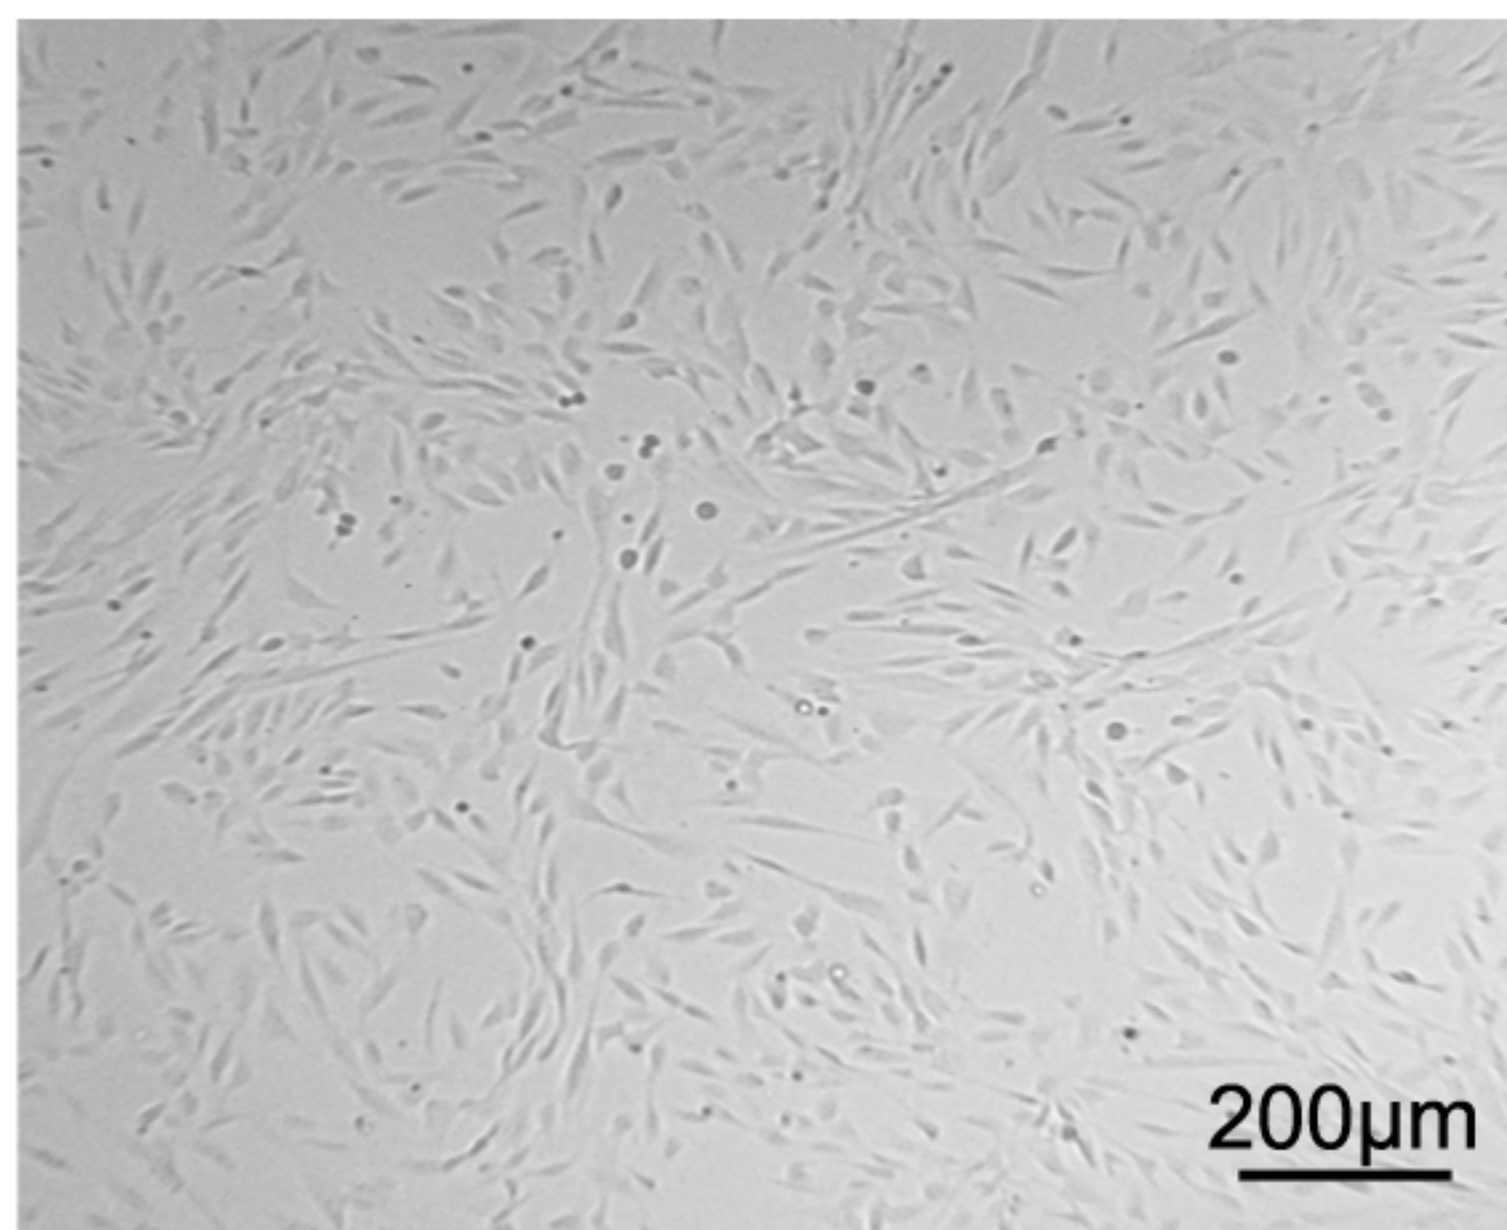**B**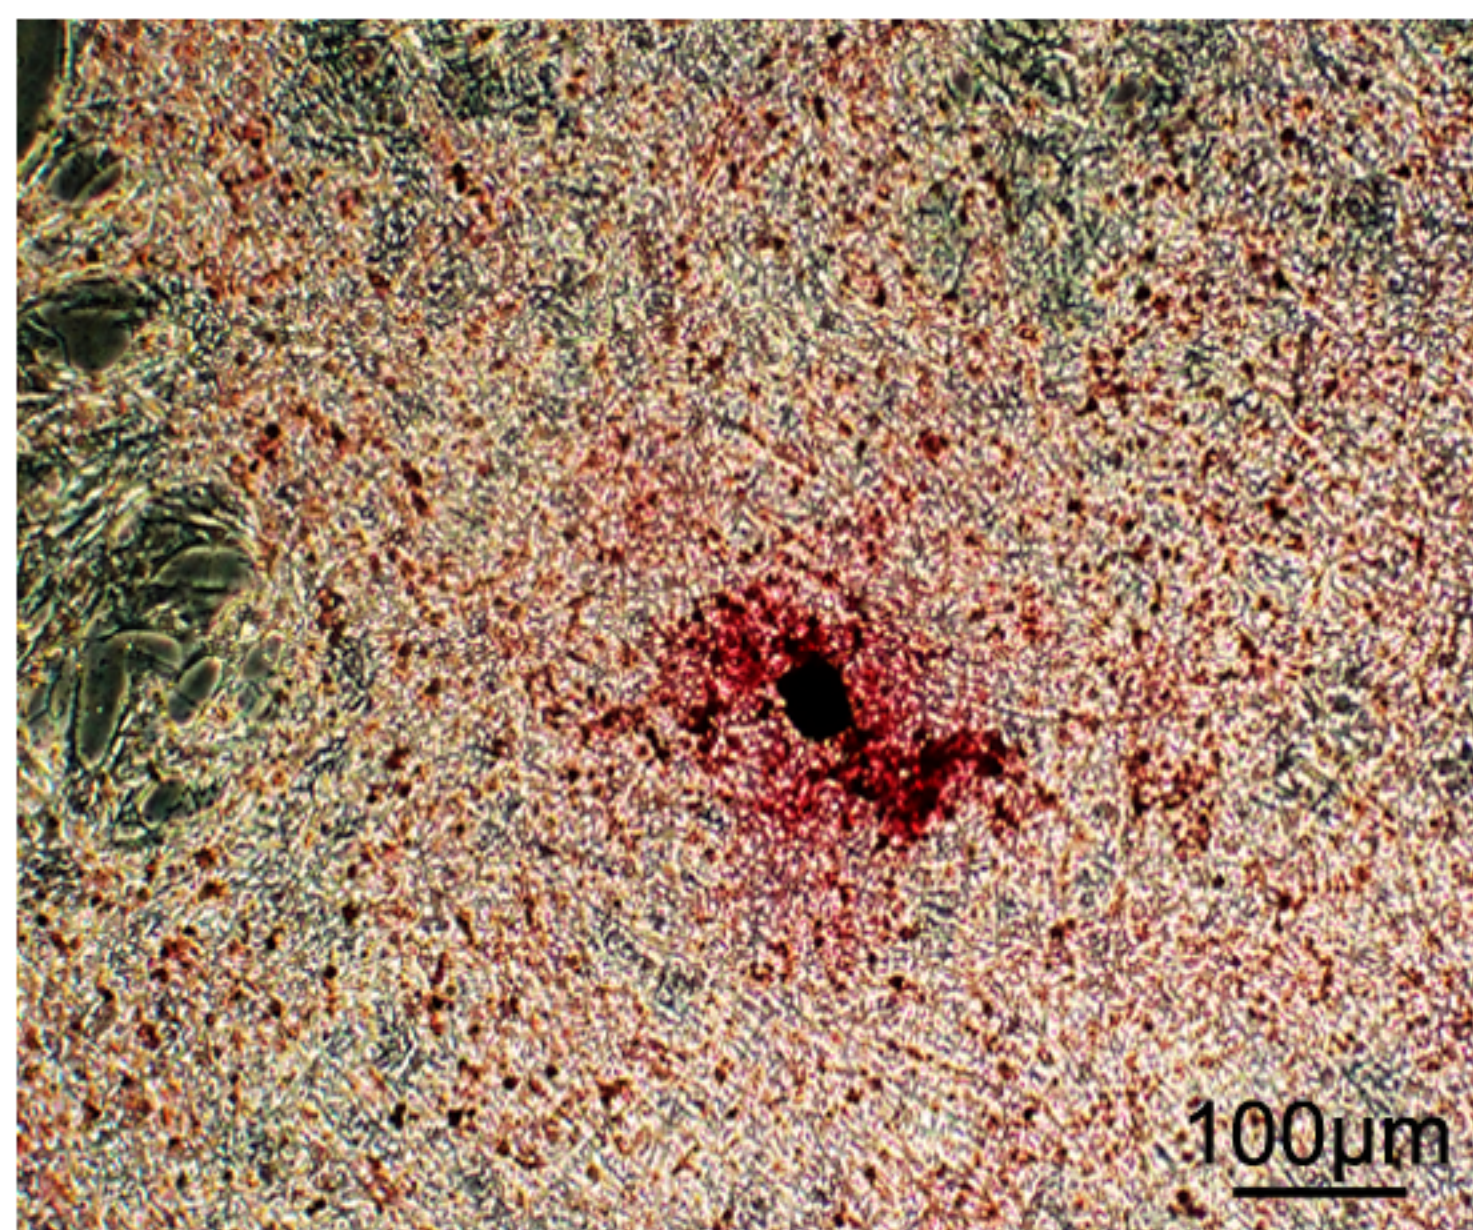**C**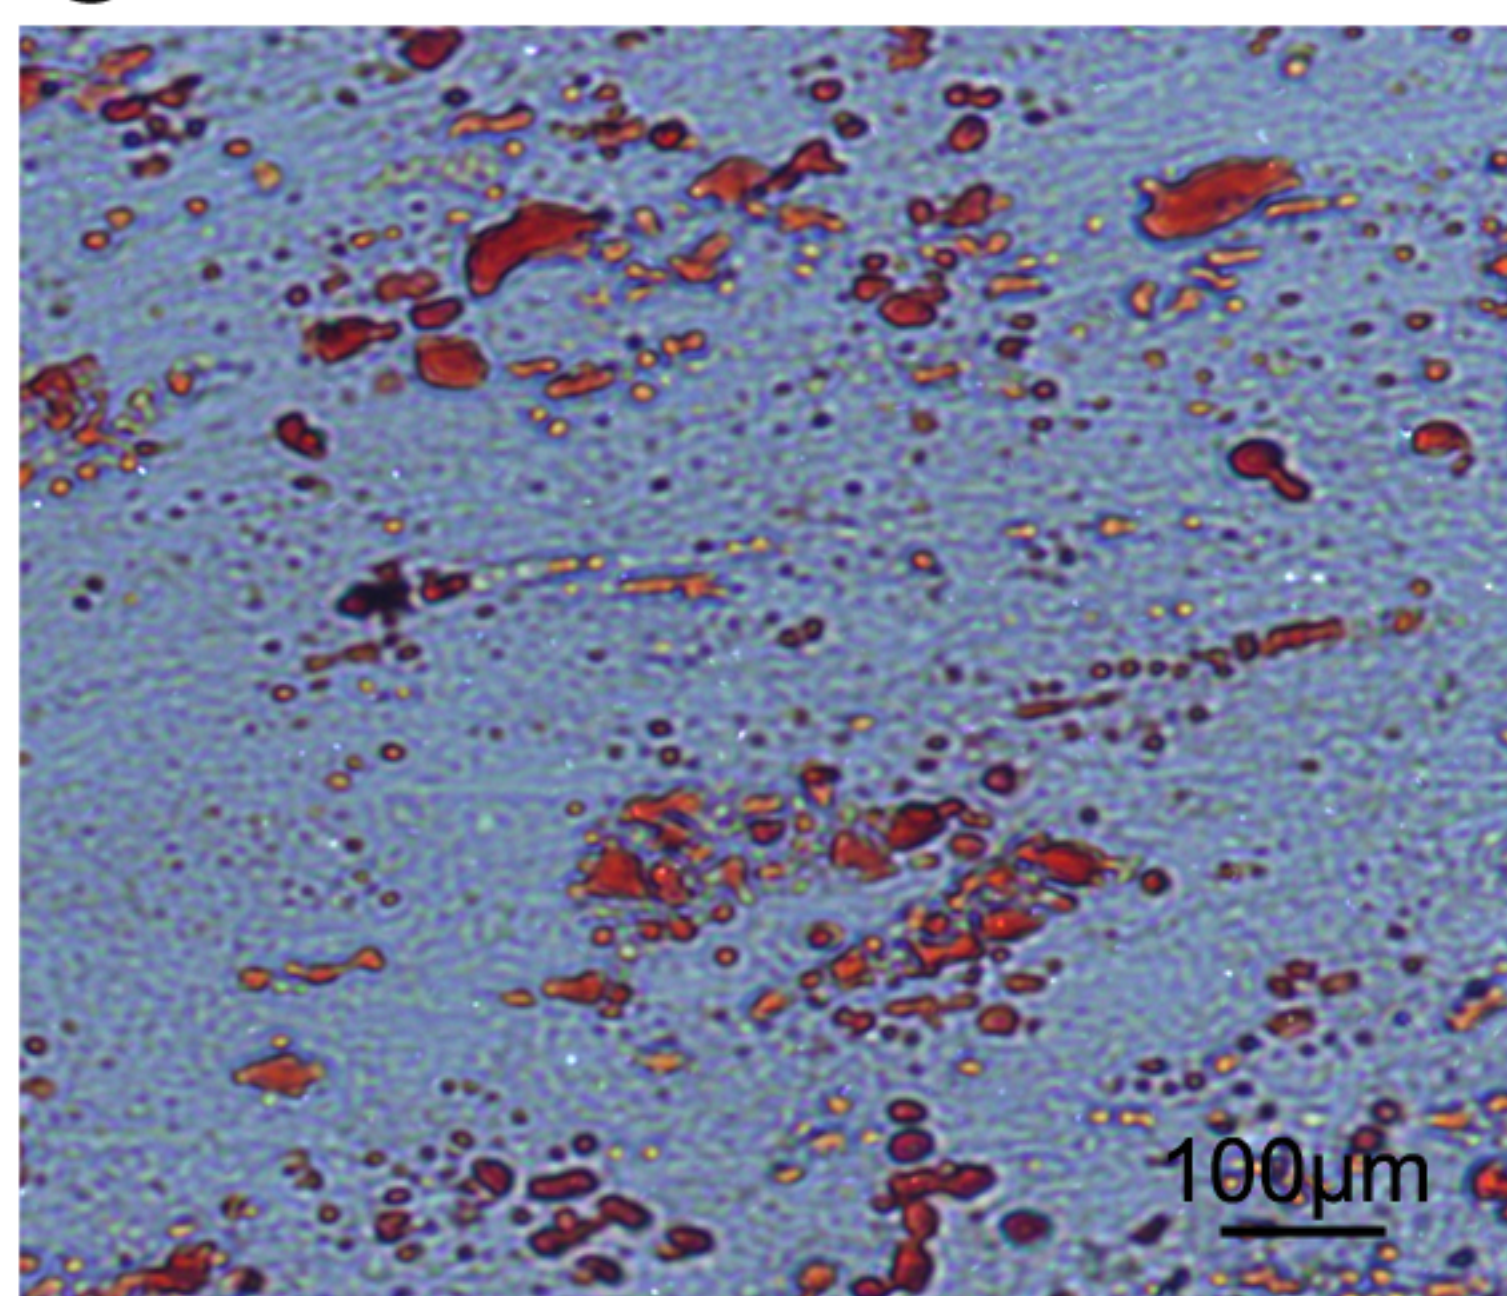**D**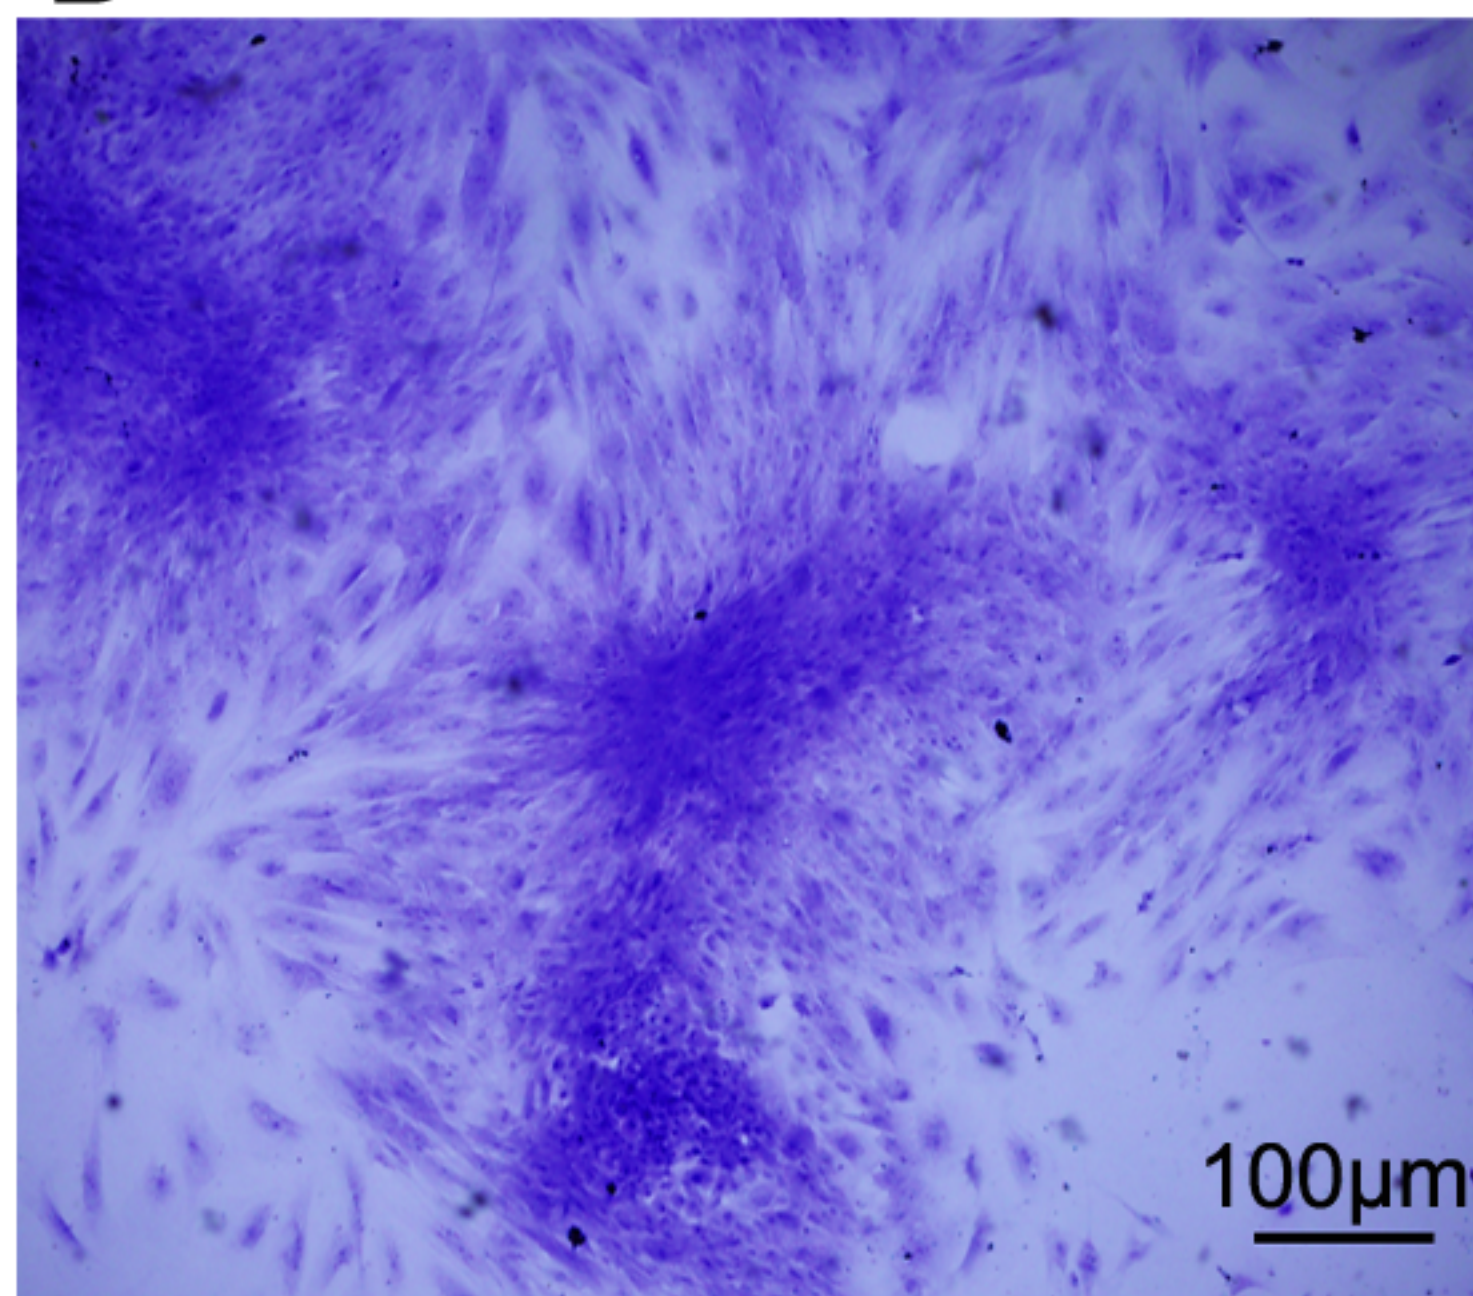**E**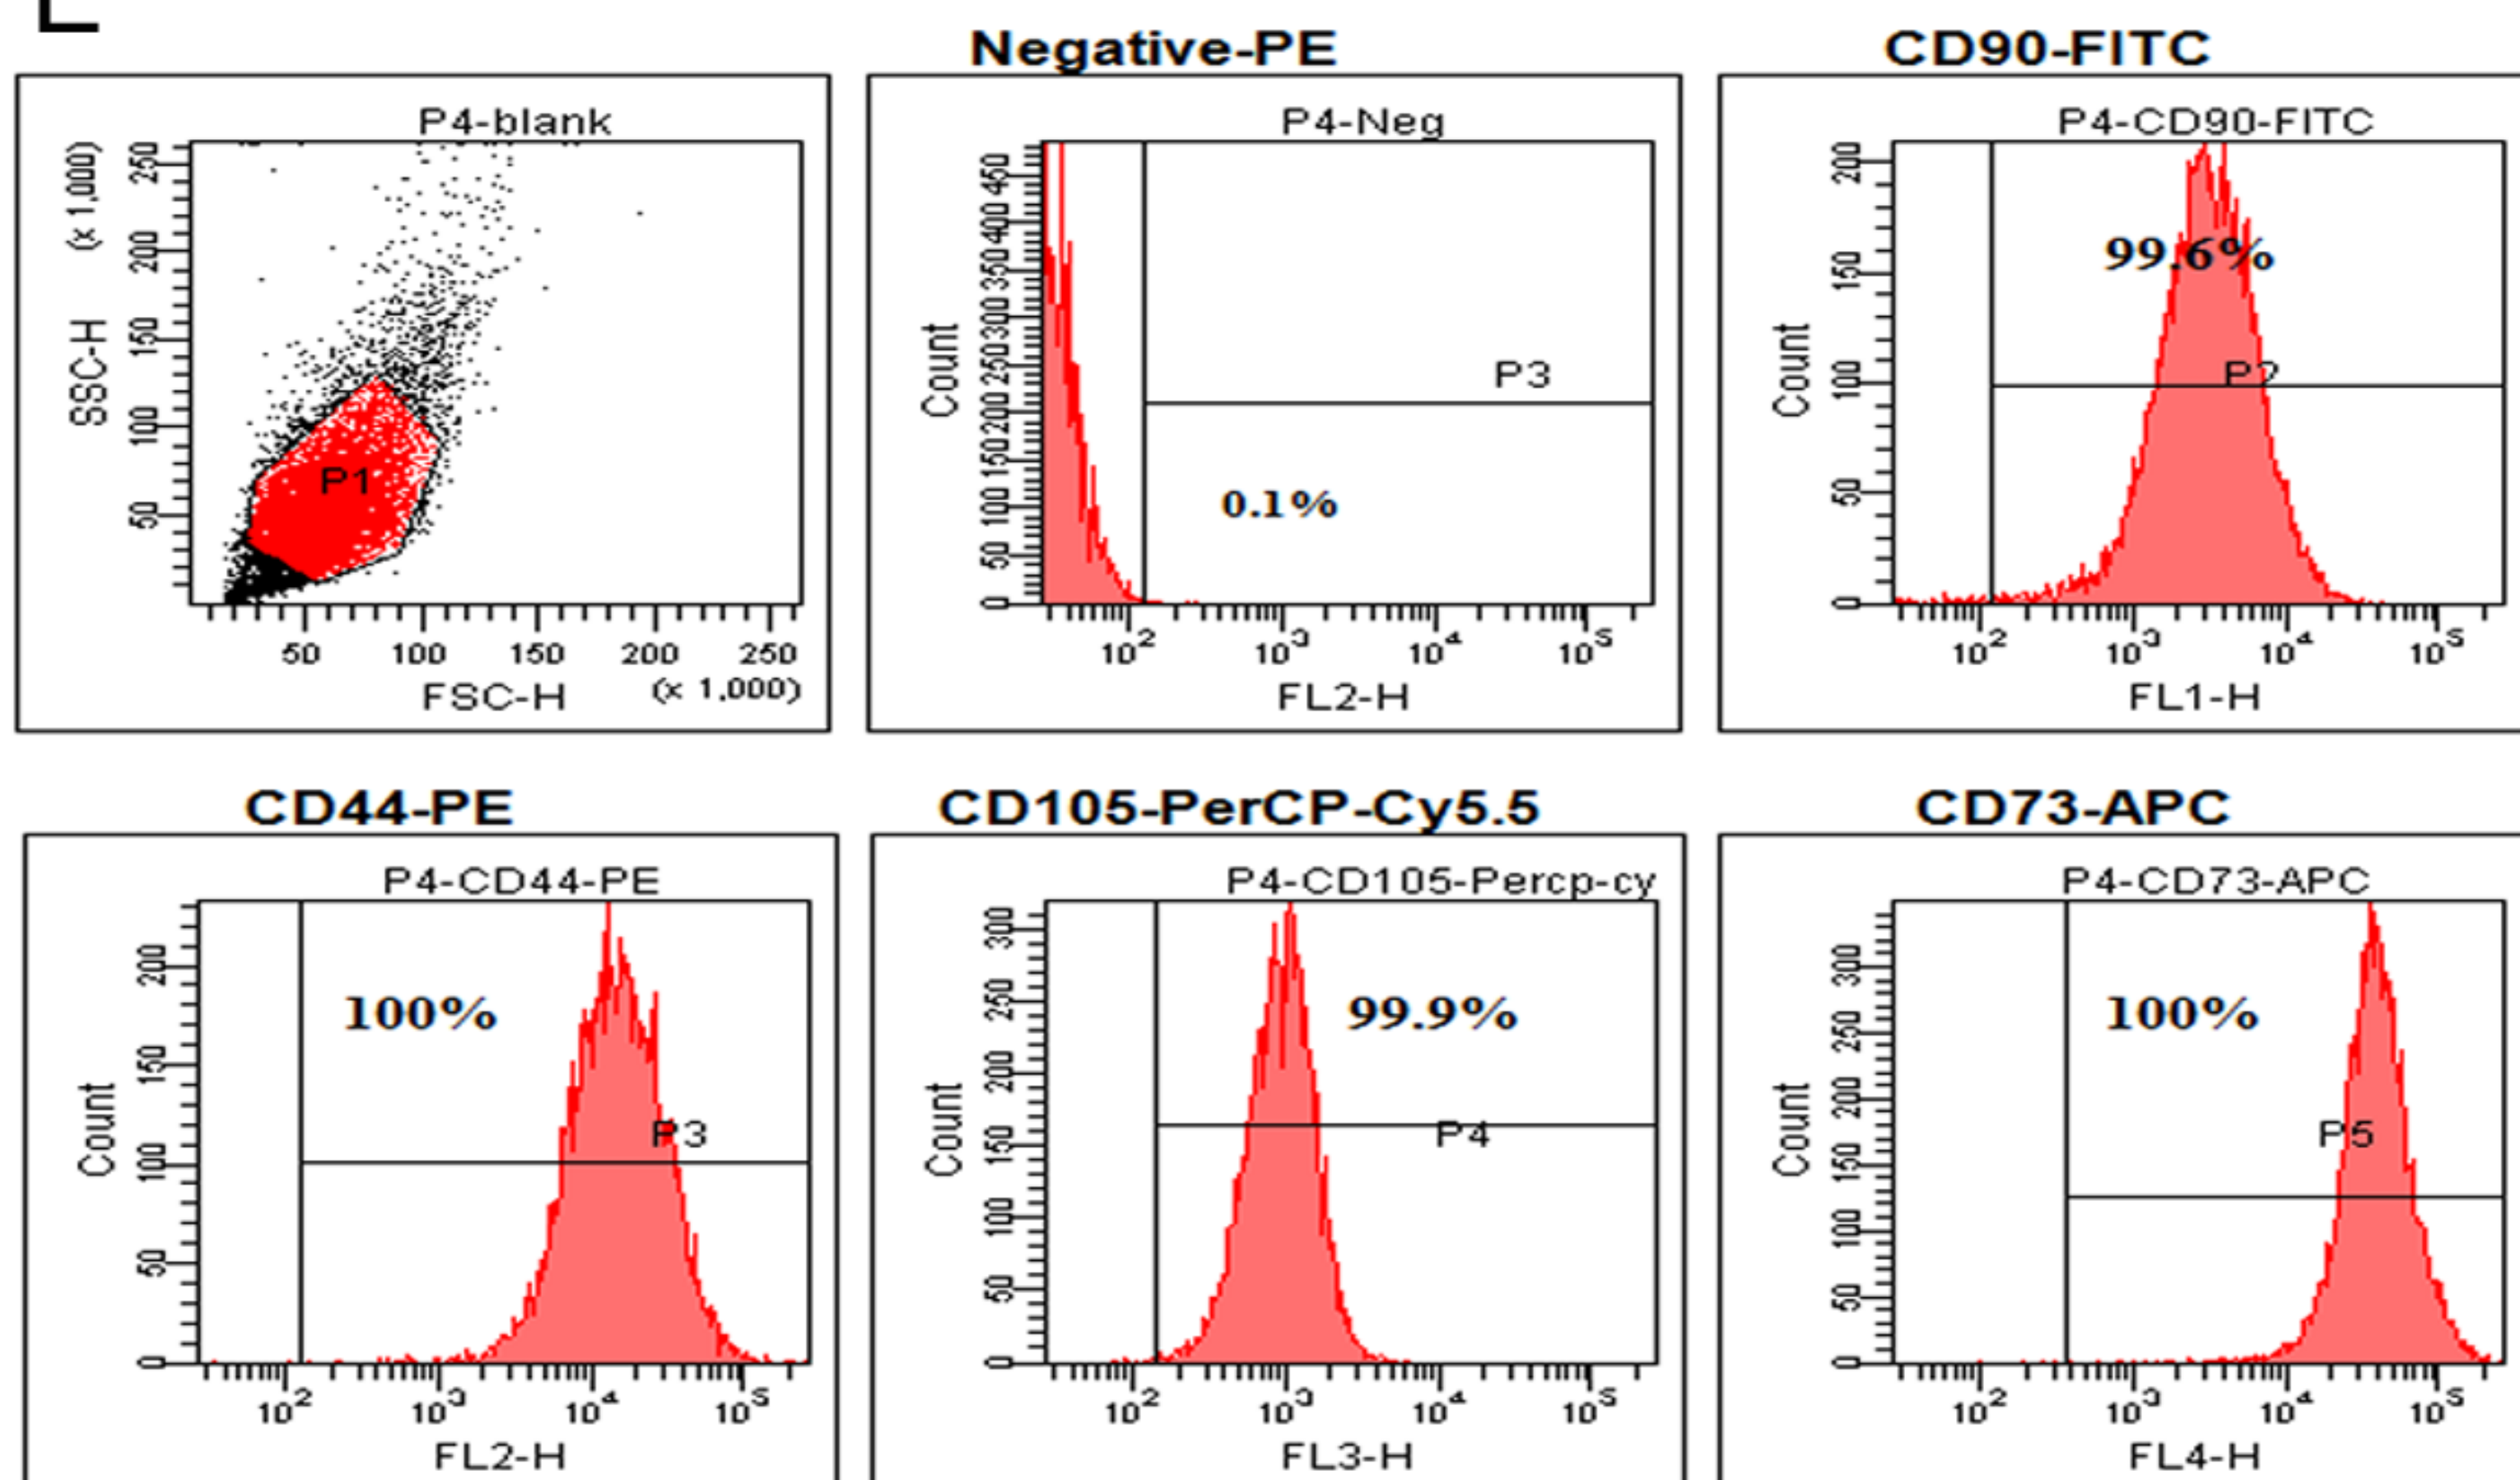



DBM14D

LTEC14D

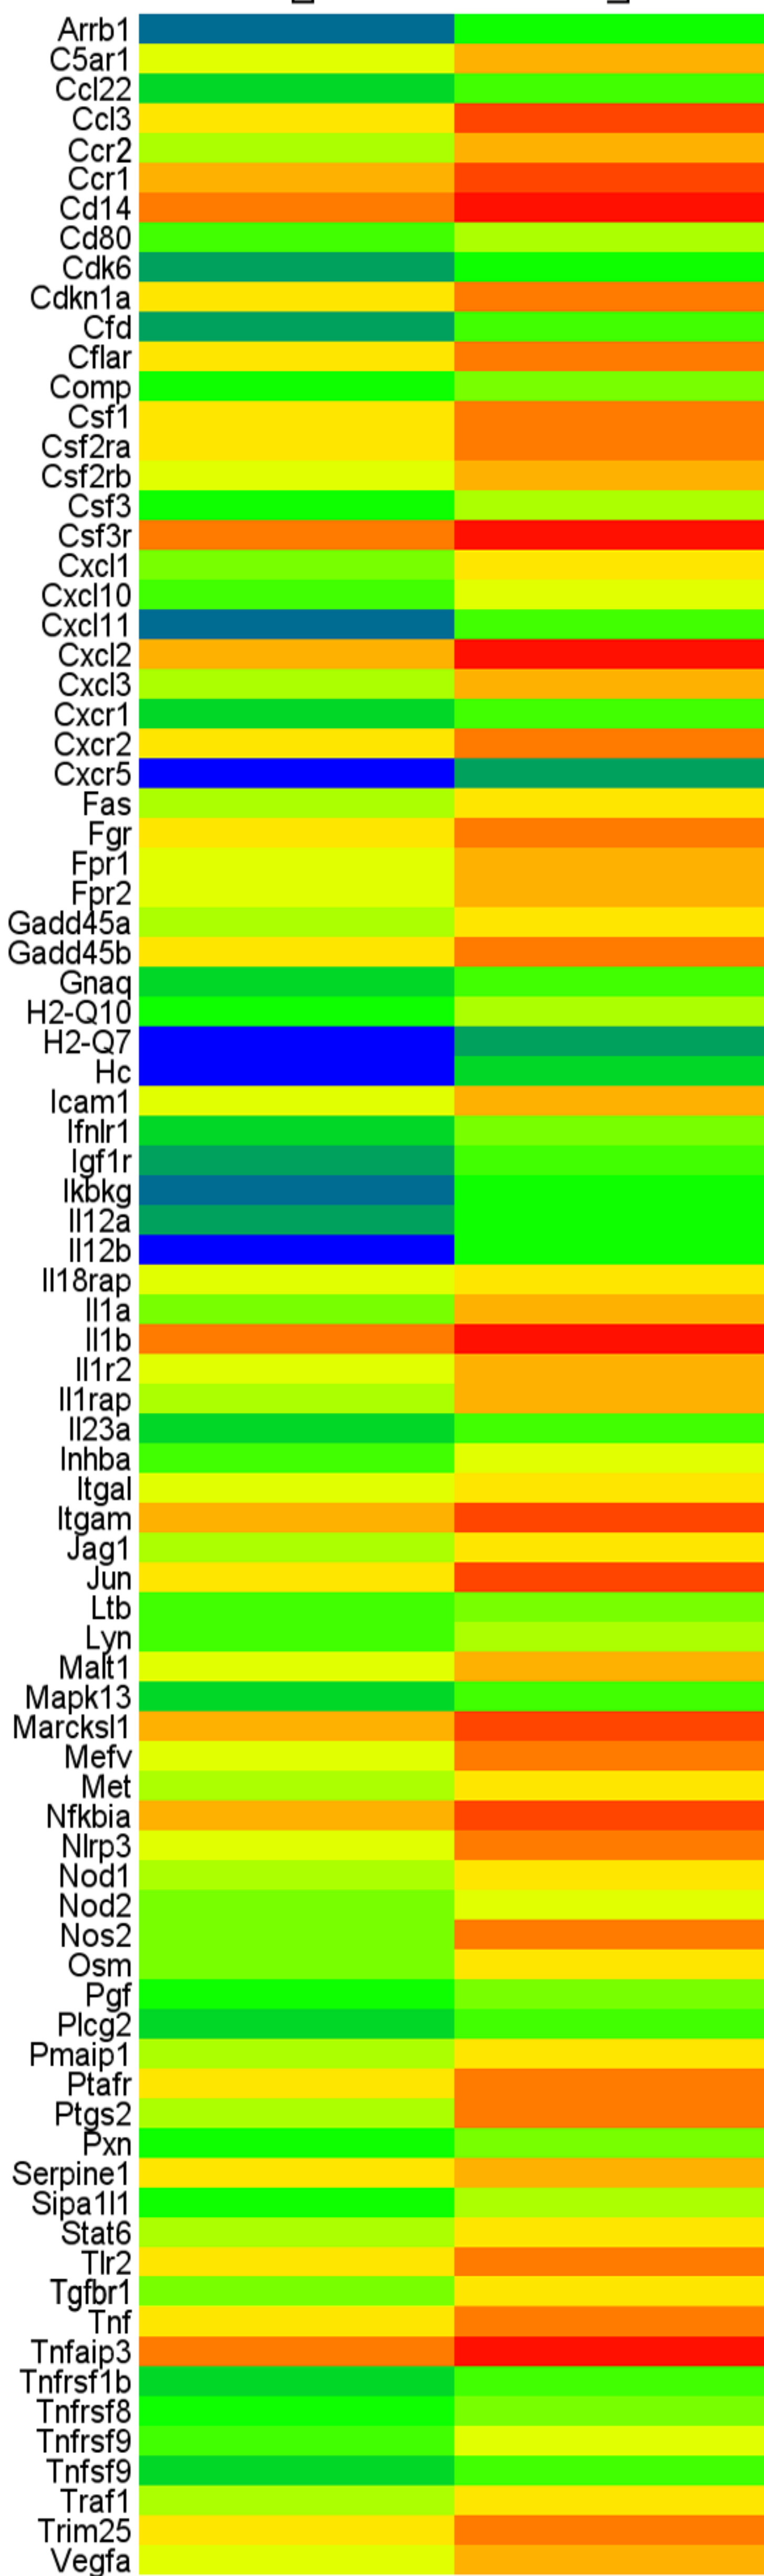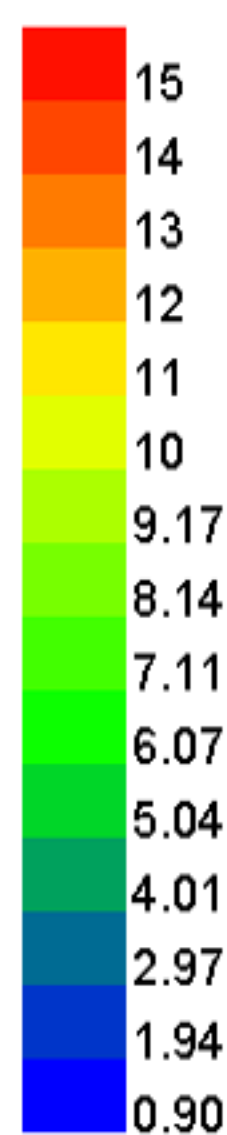

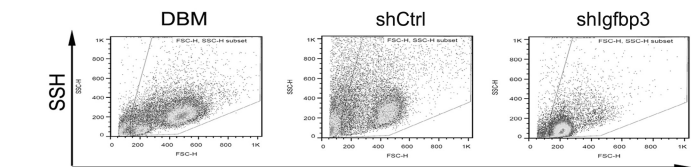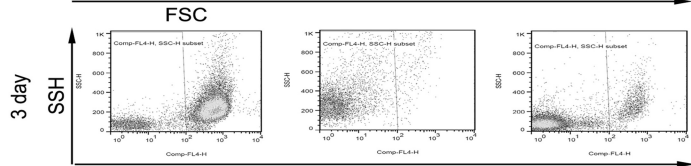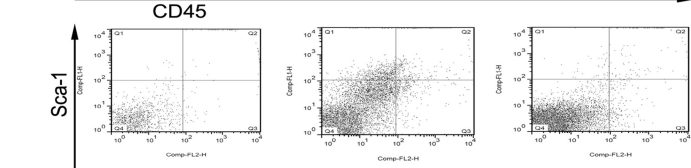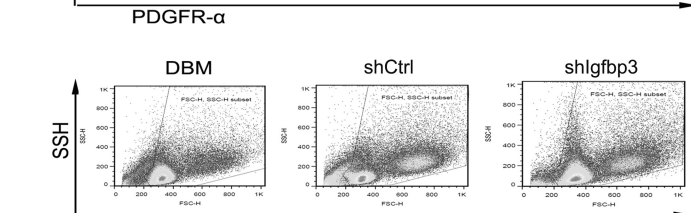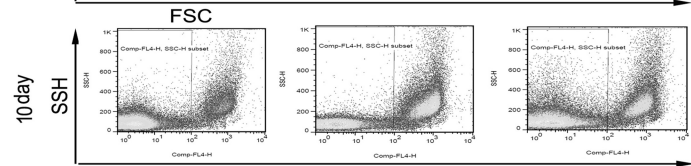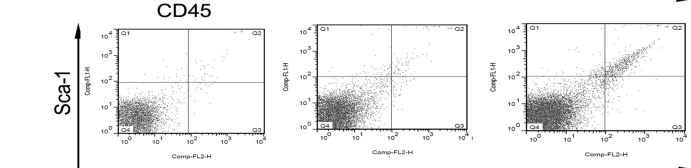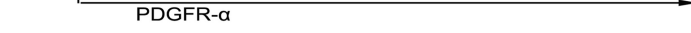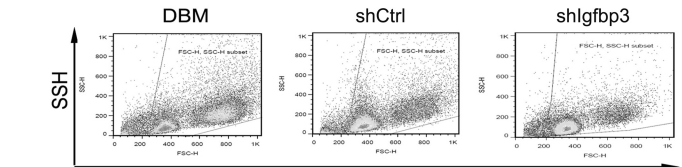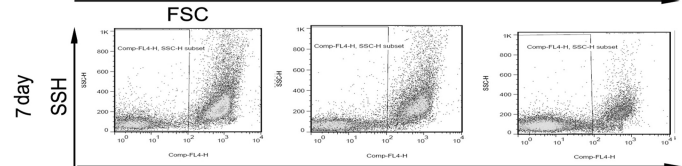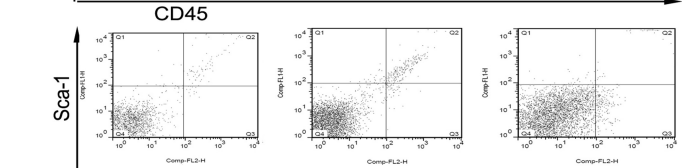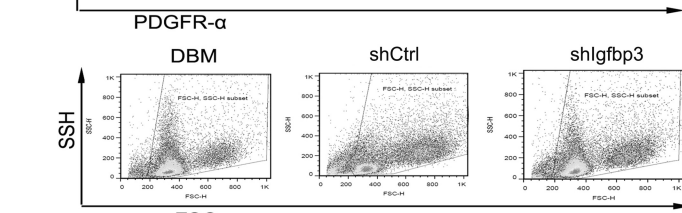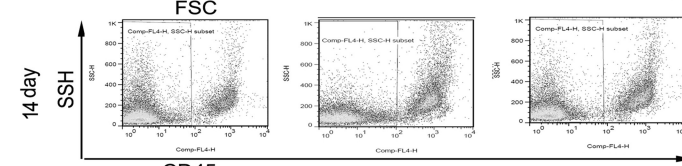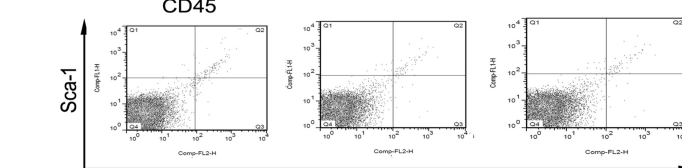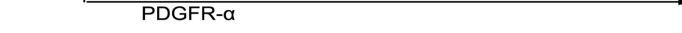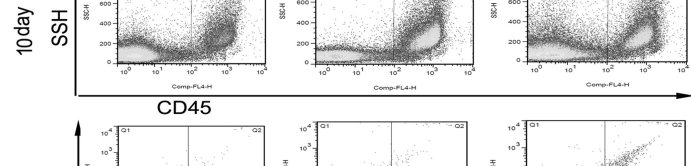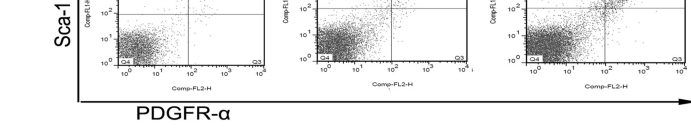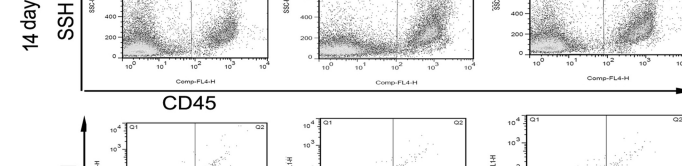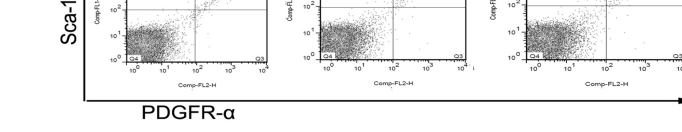

Supplemental Figure 1 Identification of hUCMSCs. A: Representative phase images of adherent P4 MSCs. B: The presence of calcium mineralization (Alizarin Red). C: Lipid vacuoles formation (Oil red O). D: The presence of chondrogenesis (Alcian Blue). E: Phenotype of P4 MSCs (MSC positive cocktail: FITC CD90, PerCP-Cy<sup>TM</sup>5.5 CD105 and APC CD73, and the negative MSC cocktail: PE CD45, PE CD34, PE CD11b, PE CD19 and PE HLA-DR)

Supplemental Figure 2 Heatmap constructed by promigratory 89 genes derived from the significant pathways.

Supplemental Figure 3: Endogenous MSC kinetics postimplantation. Representative Sca-1 versus PDGFR- $\alpha$  plots were gated on CD45<sup>-</sup> cells in DBM, *shCtrl* and *shIgfbp3* groups at 3, 7, 10 and 14 days postimplantation. Plots are representative of three independent experiments.
